# Supplementary material for: The Splicing Factor SR45 Negatively Regulates Anthocyanin Accumulation under High-Light Stress in Arabidopsis thaliana
Source: MDPI journal article supplement (doi:10.3390/life13061386), 2023-06-14
Supplement: s1 [file s1]

**Supplemental Table S1: RT-qPCR primers (Forward-Reverse, 5' to 3')**

| Gene ID   | Gene Name      | Forward Primer             | Reverse Primer               |
|-----------|----------------|----------------------------|------------------------------|
| AT1G16610 | <i>SR45</i>    | AAGTCCTGCTGGACCTGCTA       | CCTTCTTCGAACAGGACTGC         |
| AT5G08640 | <i>FLS1</i>    | ACACCATCCCCCAAATTACA       | TTAGATCGACGACGGGAATC         |
| AT4G31877 | <i>miR156c</i> | AAAAGCCTCAGATCTAACTCCAACAC | GCGTTTCTCTTAAAATTTGTCCCAAACT |
| AT2G42200 | <i>SPL9</i>    | TCAACAGTGCAGCAGGTTTC       | TTCCATTTCATTCCAGCATCA        |
| AT3G18780 | <i>ACT2</i>    | GGCAAGTCATCACGATTGG        | CAGCTTCCATTCCCACAAAC         |
